# Supplementary material for: Ameloblastoma Phenotypes Reflected in Distinct Transcriptome Profiles
Source: PubMed Central journal article supplement (PMC4974613; doi:10.1038/srep30867), 2016-08-05
Supplement: srep30867-s1.pdf [file srep30867-s1.pdf]

## **Supplementary Information**

Ameloblastoma Phenotypes Reflected in Distinct Transcriptome Profiles

Shijia Hu<sup>1,2</sup>, Joel Parker<sup>3</sup>, Kimon Divaris<sup>1,4</sup>, Ricardo Padilla<sup>5</sup>, Valerie Murrah<sup>5</sup>, John Timothy Wright<sup>1</sup>

<sup>1</sup>Pediatric Dentistry, School of Dentistry University of North Carolina-Chapel Hill, Chapel Hill, NC, USA

<sup>2</sup>Faculty of Dentistry, National University of Singapore, Singapore

<sup>3</sup>Cancer Genetics, University of North Carolina-Chapel Hill, Chapel Hill, NC, USA

<sup>4</sup>Epidemiology, Gillings School of Global Public Health, University of North Carolina-Chapel Hill, Chapel Hill, NC, USA

<sup>5</sup>Diagnostic Sciences, School of Dentistry, University of North Carolina-Chapel Hill, Chapel Hill, NC, USA

**Supplementary Figure 1** – Scatterplot of Microarray (x-axis) differential expression versus NanoString (y-axis) differential expression.

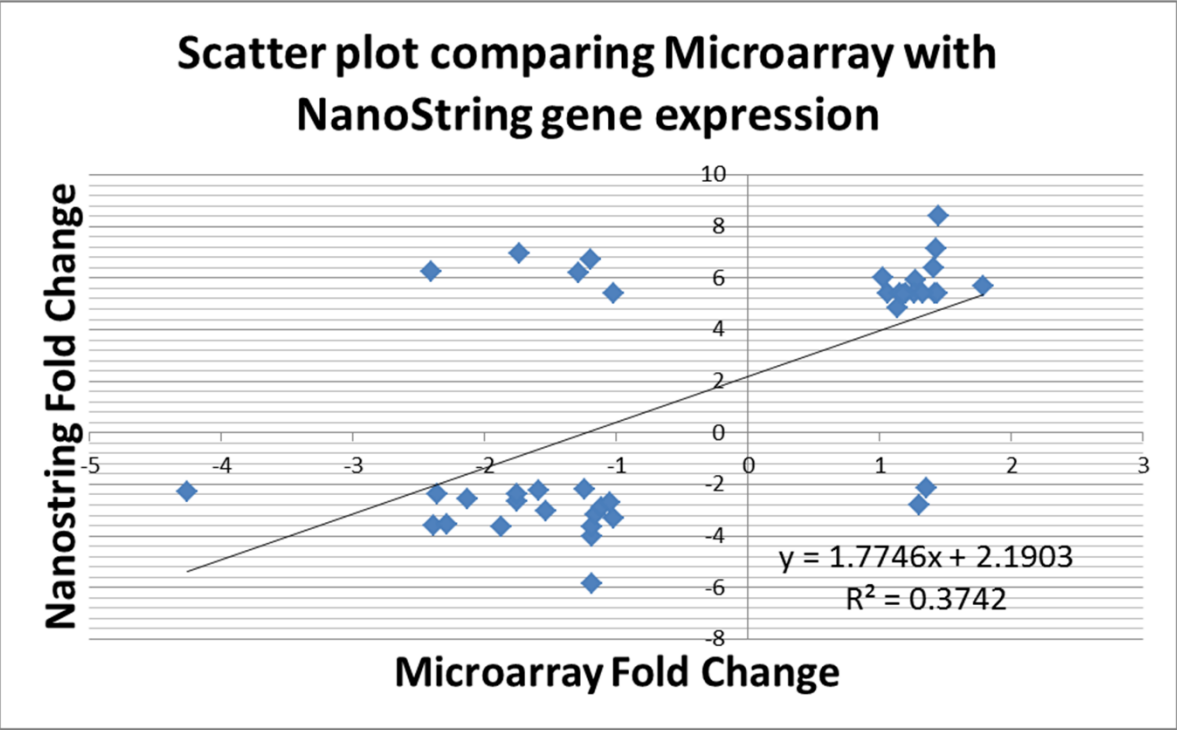

**Supplementary Figure 2** – Unsupervised hierarchical cluster analysis of reference tissue with tumor samples. 3126 genes with the greatest standard deviation between the samples were used for the cluster analysis.

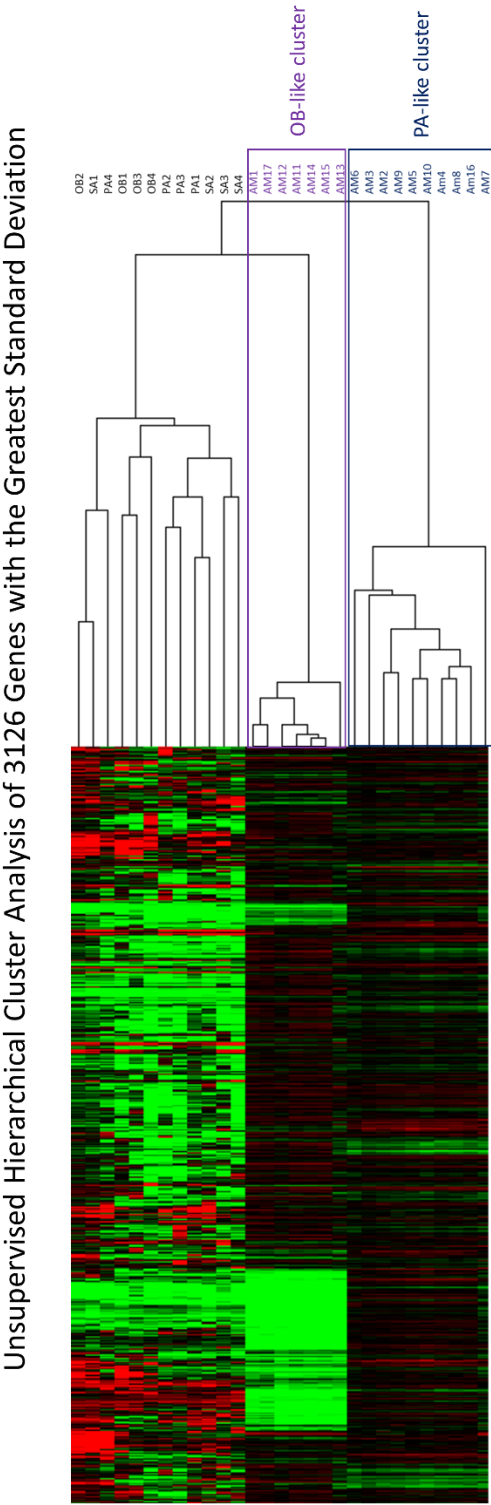

**Supplementary Figure 3** – Correlation analysis with The Cancer Genome Atlas subtypes suggesting no significant correlation between ameloblastoma and the 13 cancer subtypes.

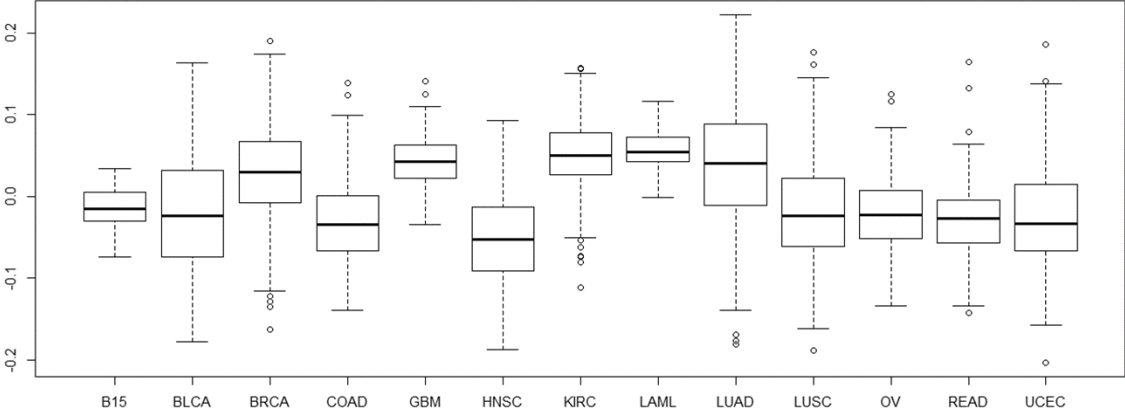

**Supplemental Table 1**

| <b>Tumor samples RNA yield and quality</b> |                    |                             |                  |                  |                   |
|--------------------------------------------|--------------------|-----------------------------|------------------|------------------|-------------------|
| <b>Sample Name</b>                         | <b>Tissue type</b> | <b>Nanodrop assessment</b>  |                  |                  | <b>yield (ng)</b> |
|                                            |                    | <b>ng/<math>\mu</math>l</b> | <b>A 260/280</b> | <b>A 260/230</b> |                   |
| Am1                                        | Fresh              | 13.1                        | 2.45             | 1.64             | 195.9             |
| Am2                                        | FFPE               | 4.4                         | 1.7              | 0.4              | 88.0              |
| Am3                                        | FFPE               | 46.4                        | 2.1              | 1.5              | 928.0             |
| Am4                                        | FFPE               | 41.3                        | 2.0              | 0.7              | 826.0             |
| Am5                                        | FFPE               | 35.5                        | 1.8              | 0.6              | 710.0             |
| Am6                                        | FFPE               | 7.6                         | 1.6              | 0.6              | 152.0             |
| Am7                                        | FFPE               | 19.2                        | 1.9              | 1.0              | 384.0             |
| Am8                                        | FFPE               | 15.9                        | 2.1              | 1.1              | 318.0             |
| Am9                                        | FFPE               | 27.2                        | 2.1              | 1.4              | 544.0             |
| Am10                                       | FFPE               | 23.5                        | 1.9              | 0.5              | 470.0             |
| Am11                                       | FFPE               | 46.9                        | 2.15             | 2.00             | 703.8             |
| Am12                                       | FFPE               | 15.5                        | 1.43             | 0.08             | 309.8             |
| Am13                                       | FFPE               | 8.6                         | 2.04             | 0.86             | 172.4             |
| Am14                                       | FFPE               | 5.1                         | 1.85             | 0.30             | 101.1             |
| Am15                                       | FFPE               | 21.4                        | 1.74             | 0.18             | 427.2             |
| Am16                                       | FFPE               | 10.2                        | 1.7              | 1.2              | 204.0             |
| Am17                                       | Fresh              | 5.8                         | 2.55             | 1.17             | 87.2              |

**Supplementary Table 2****Top 20 upregulated genes in ameloblastoma compared to pre-secretory ameloblast**

| <b>Gene Name</b> | <b>NanoString Fold Change</b> | <b>Microarray Fold change</b> |
|------------------|-------------------------------|-------------------------------|
| IL1A             | 8.39                          | 1.45                          |
| IL8              | 7.16                          | 1.43                          |
| AREG             | 6.96                          | -1.74                         |
| IL1B             | 6.74                          | -1.19                         |
| MMP1             | 6.38                          | 1.41                          |
| SERPINE1         | 6.23                          | -2.41                         |
| CASP10           | 6.19                          | -1.29                         |
| CSF3             | 6.03                          | 1.02                          |
| MMP3             | 5.91                          | 1.27                          |
| NTRK1            | 5.67                          | 1.79                          |
| CYP1A1           | 5.43                          | 1.41                          |
| GATA1            | 5.43                          | 1.26                          |
| IL4              | 5.43                          | 1.06                          |
| MPL              | 5.43                          | 1.15                          |
| PLG              | 5.43                          | 1.44                          |
| TERT             | 5.43                          | -1.02                         |
| WEE1             | 5.43                          | 1.20                          |
| RET              | 5.40                          | 1.33                          |
| IL6              | 5.36                          | 1.18                          |
| EGF              | 4.84                          | 1.13                          |

**Top 20 downregulated genes in ameloblastoma compared to pre-secretory ameloblast**

| <b>Gene Name</b> | <b>NanoString Fold Change</b> | <b>Microarray Fold change</b> |
|------------------|-------------------------------|-------------------------------|
| SPP1             | -5.83                         | -1.19                         |
| TYMS             | -4.03                         | -1.18                         |
| KDR              | -3.67                         | -1.18                         |
| DLC1             | -3.63                         | -1.87                         |
| KRAS             | -3.59                         | -2.39                         |
| MYC              | -3.53                         | -2.29                         |
| FYN              | -3.29                         | -1.02                         |
| MSH6             | -3.17                         | -1.16                         |
| TOP2A            | -3.05                         | -1.53                         |
| CCNA2            | -2.91                         | -1.12                         |
| COL1A1           | -2.79                         | 1.30                          |
| JUNB             | -2.73                         | -1.05                         |
| IGF1             | -2.68                         | -1.76                         |
| PDGFRA           | -2.56                         | -2.13                         |
| EPS8             | -2.36                         | -2.36                         |
| CCND2            | -2.36                         | -1.76                         |

|        |       |       |
|--------|-------|-------|
| CAV1   | -2.30 | -4.27 |
| CDKN2C | -2.24 | -1.59 |
| TGFBR3 | -2.21 | -1.24 |
| FOS    | -2.12 | 1.36  |

**Supplementary Table 3** – Genes in each cluster used for pathway analysis FDR < 1%

Data uploaded at

[http://genomewide.net/public/transcriptome/ameloblastoma/Supplemental\\_Table\\_2.xlsx](http://genomewide.net/public/transcriptome/ameloblastoma/Supplemental_Table_2.xlsx)



**Supplementary Table 4**

| <b>Upregulated gene sets of the ameloblastoma common tumor cluster compared to normal cells</b> |                        |                         |                                    |                        |
|-------------------------------------------------------------------------------------------------|------------------------|-------------------------|------------------------------------|------------------------|
| <b>Gene Set</b>                                                                                 | <b>Number of genes</b> | <b>Enrichment Score</b> | <b>Normalized enrichment score</b> | <b>Nominal p-value</b> |
| GAUSSMANN_MLL_AF4_FUSION_TARGETS_F_DN                                                           | 12                     | 0.70                    | 1.57                               | > 0.01                 |
| LEE_LIVER_CANCER_E2F1_DN                                                                        | 14                     | 0.58                    | 1.68                               | > 0.01                 |
| BROWNE_HCMV_INFECTION_10HR_UP                                                                   | 24                     | 0.45                    | 1.55                               | > 0.01                 |
| PACHER_TARGETS_OF_IGF1_AND_IGF2_UP                                                              | 14                     | 0.54                    | 1.52                               | 0.01                   |
| TONKS_TARGETS_OF_RUNX1_RUNX1T1_FUSION_SUSTAINED_IN_ERYTHROCYTE_UP                               | 14                     | 0.61                    | 1.68                               | 0.01                   |
| HOUSTIS_ROS                                                                                     | 15                     | 0.63                    | 1.47                               | 0.01                   |
| NAKAYAMA_SOFT_TISSUE_TUMORS_PCA1_UP                                                             | 22                     | 0.52                    | 1.72                               | 0.02                   |
| SINGH_NFE2L2_TARGETS                                                                            | 10                     | 0.77                    | 1.43                               | 0.02                   |
| GERHOLD_ADIPOGENESIS_UP                                                                         | 19                     | 0.49                    | 1.62                               | 0.02                   |
| SENESE_HDAC1_AND_HDAC2_TARGETS_UP                                                               | 76                     | 0.42                    | 1.31                               | 0.03                   |
| DACOSTA_UV_RESPONSE_VIA_ERCC3_COMMON_UP                                                         | 20                     | 0.56                    | 1.40                               | 0.03                   |
| KEGG_METABOLISM_OF_XENOBIOTICS_BY_CYP2D6                                                        | 12                     | 0.56                    | 1.59                               | 0.03                   |
| LEE_LIVER_CANCER_CIPROFIBRATE_DN                                                                | 12                     | 0.47                    | 1.52                               | 0.03                   |
| KRIGE_AMINO_ACID_DEPRIVATION                                                                    | 13                     | 0.65                    | 1.39                               | 0.03                   |
| MANTOVANI_VIRAL_GPCR_SIGNALING_UP                                                               | 28                     | 0.37                    | 1.42                               | 0.03                   |
| SU_LIVER                                                                                        | 14                     | 0.54                    | 1.63                               | 0.04                   |
| ADDYA_ERYTHROID_DIFFERENTIATION_BY_HEMATOPOIETIN                                                | 21                     | 0.54                    | 1.42                               | 0.04                   |
| KERLEY_RESPONSE_TO_CISPLATIN_UP                                                                 | 11                     | 0.51                    | 1.57                               | 0.04                   |
| SMID_BREAST_CANCER_LUMINAL_A_DN                                                                 | 12                     | 0.62                    | 1.45                               | 0.05                   |
